# Supplementary material for: Identification of ε-Poly-L-lysine as an Antimicrobial Product from an Epichloë Endophyte and Isolation of Fungal ε-PL Synthetase Gene
Source: PubMed Central journal article supplement (PMC7179176; doi:10.3390/molecules25051032), 2020-02-25
Supplement: molecules-25-01032-s001.pdf [file molecules-25-01032-s001.pdf]

## Supplementary materials

### Identification of $\epsilon$ -Poly-L-lysine as an Antimicrobial Product from an Epichloë Endophyte and Isolation of Fungal $\epsilon$ -PL Synthetase Gene

Enkhee Purev, Tatsuhiko Kondo, Daigo Takemoto, Jennifer T. Niones, Makoto Ojika\*

#### Contents

Table S1. Antifungal activity of  $\epsilon$ -PL

Figure S1.  $^1\text{H}$ -NMR spectrum of  $\epsilon$ -PL from *Ptef::VibA* (E437) (400 Hz,  $\text{D}_2\text{O}$ )

Figure S2.  $^{13}\text{C}$ -NMR spectrum of  $\epsilon$ -PL from *Ptef::VibA* (E437) (100 Hz,  $\text{D}_2\text{O}$ )

Figure S3. DQF-COSY spectrum of  $\epsilon$ -PL from *Ptef::VibA* (E437) (400 Hz,  $\text{D}_2\text{O}$ )

Figure S4. HSQC spectrum of  $\epsilon$ -PL from *Ptef::VibA* (E437) (400 MHz,  $\text{D}_2\text{O}$ )

Figure S5. HMBC spectrum of  $\epsilon$ -PL from *Ptef::VibA* (E437) (400 Hz,  $\text{D}_2\text{O}$ )

Figure S6.  $^1\text{H}$ -NMR spectrum of standard  $\epsilon$ -PL (TFA salt) (400 Hz,  $\text{D}_2\text{O}$ )

Figure S7. Determination of absolute configuration of  $\epsilon$ -PL by the advanced Marfey's method

Figure S8. Alignment of the deduced amino acid sequences of adenylation domain of *E. festucae*  $\epsilon$ -PL synthetase (EfEpls) and first adenylation domain of *Bacillus licheniformis* bacitracin synthetase 2 (BIBacB, accession No. AAC06347)

Figure S9. Fungal growth inhibition by  $\epsilon$ -PL against *Drechslera erythrospila* and *Phytophthora capsici*.

**Table S1** | Antifungal activity of  $\epsilon$ -PL<sup>a</sup>

| Fungi                  | MID ( $\mu$ g/disk)                     |                                                      |                                         |
|------------------------|-----------------------------------------|------------------------------------------------------|-----------------------------------------|
|                        | Standard $\epsilon$ -PL<br>(DP = 25–35) | $\epsilon$ -PL (DP = 8–25<br>and 26–34) <sup>b</sup> | $\epsilon$ -PL (DP = 8–23) <sup>c</sup> |
| <i>D. erythrospila</i> | 300                                     | 300                                                  | 300                                     |
| <i>P. capsici</i>      | 300                                     | 300                                                  | 300                                     |
| <i>C. orbiculare</i>   | >300                                    | >300                                                 | >300                                    |
| <i>F. oxysporum</i>    | >300                                    | >300                                                 | >300                                    |
| <i>B. cinerea</i>      | >100                                    | >100                                                 | >100                                    |
| <i>M. oryzae</i>       | >100                                    | >100                                                 | >100                                    |
| <i>A. alternata</i>    | >100                                    | >100                                                 | >100                                    |
| <i>A. niger</i>        | >100                                    | >100                                                 | >100                                    |

<sup>a</sup> Expressed as minimum inhibitory dose (MID) that induces a definite inhibitory zone between paper disk and pathogen colony.

<sup>b</sup> Isolated from *Ptef::Epls* (E437) transformant. Degree of polymerization (DP) is indicated in parenthesis.

<sup>c</sup> Isolated from *Ptef::Epls* (F11) transformant.

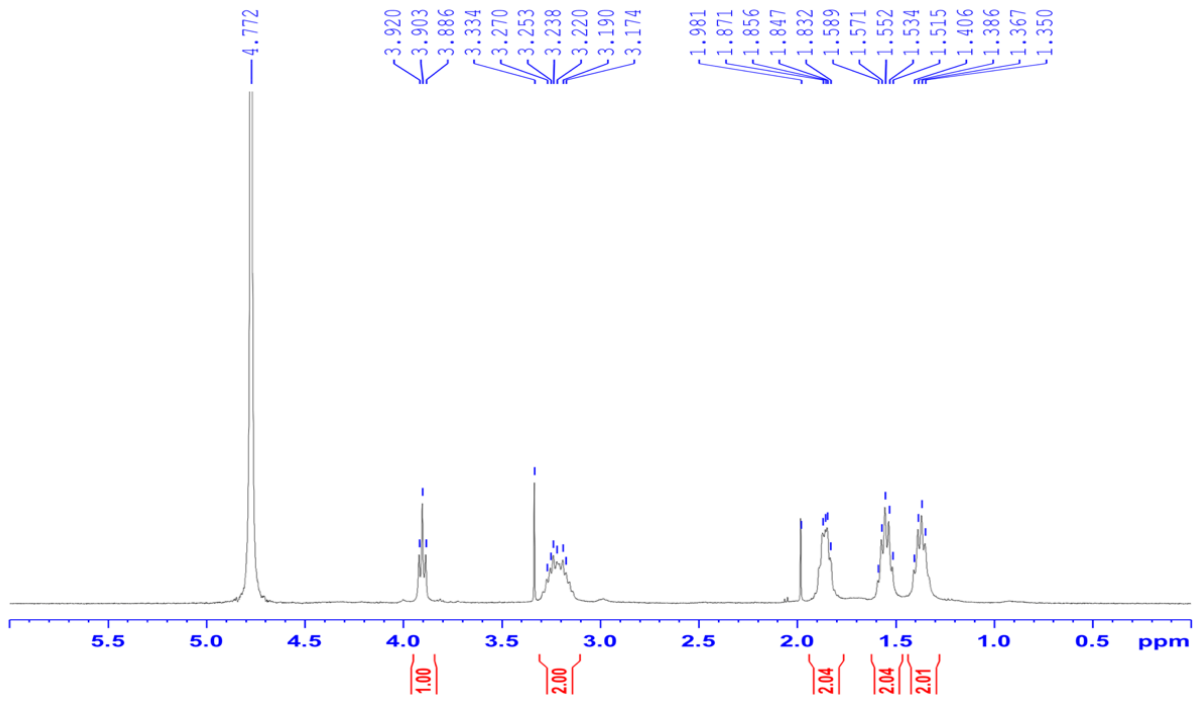

**Figure S1** | <sup>1</sup>H-NMR spectrum of ε-PL from *Ptef::VibA* (E437) (400 Hz, D<sub>2</sub>O)

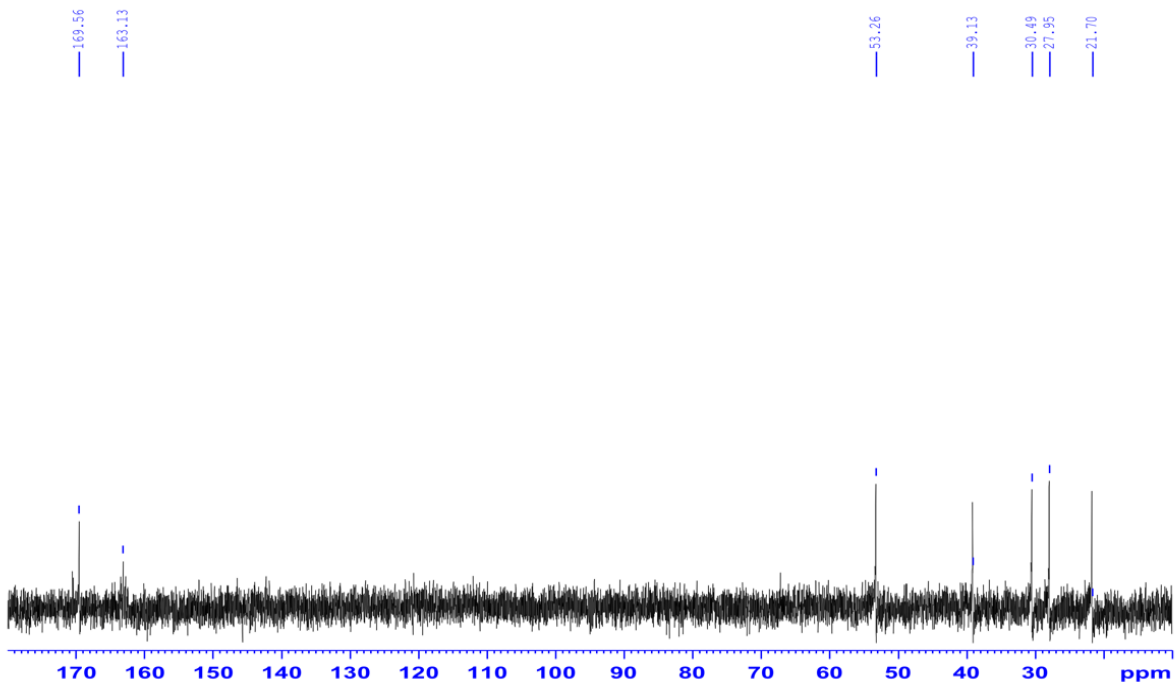

**Figure S2** | <sup>13</sup>C-NMR spectrum of ε-PL from *Ptef::VibA* (E437) (100 Hz, D<sub>2</sub>O)

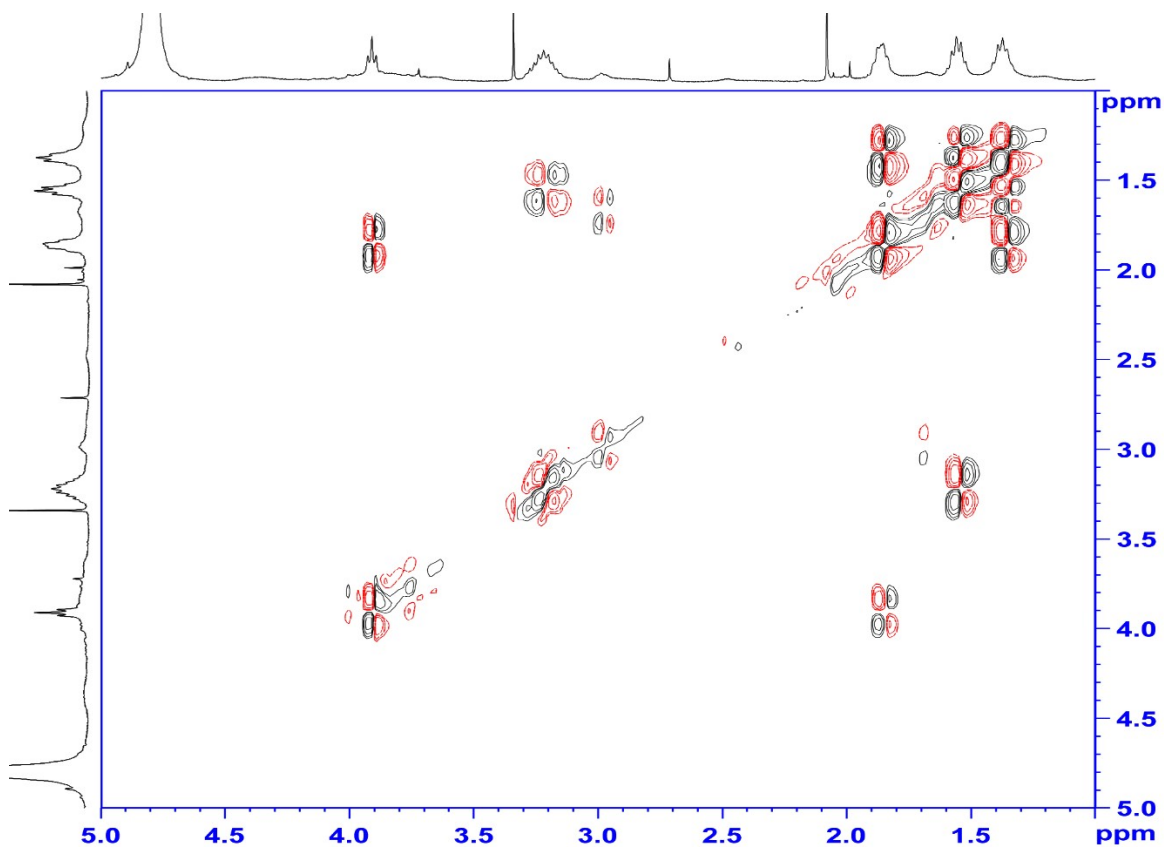

**Figure S3** | DQF-COSY spectrum of  $\epsilon$ -PL from *Ptef::VibA* (E437) (400 Hz, D<sub>2</sub>O)

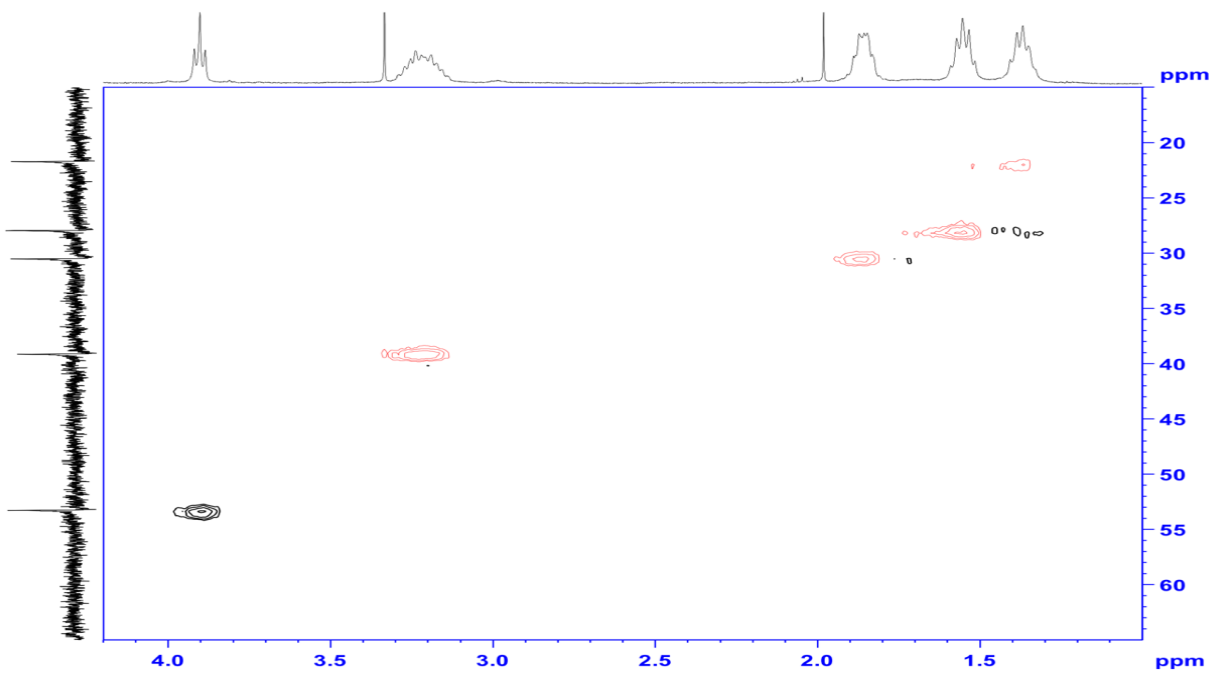

**Figure S4** | HSQC spectrum of  $\epsilon$ -PL from *Ptef::VibA* (E437) (400 MHz, D<sub>2</sub>O)

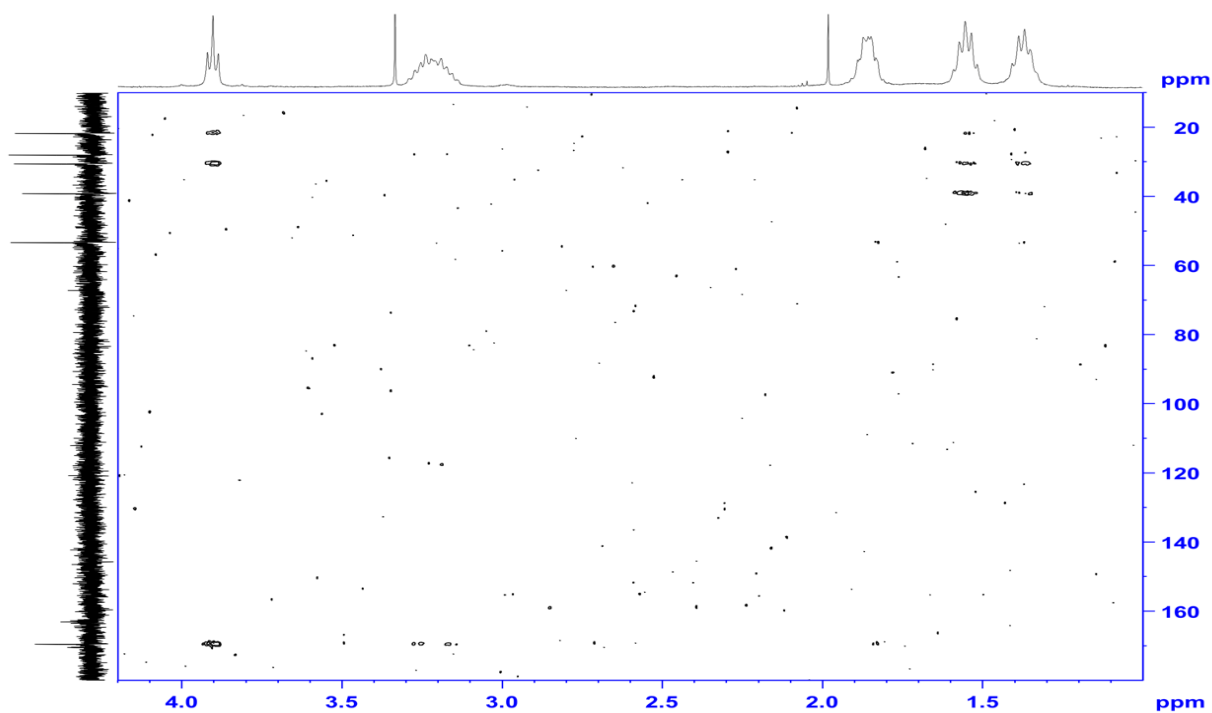

Figure S51| HMBC spectrum of  $\epsilon$ -PL from *Ptef::VibA* (E437) (400 Hz, D<sub>2</sub>O)

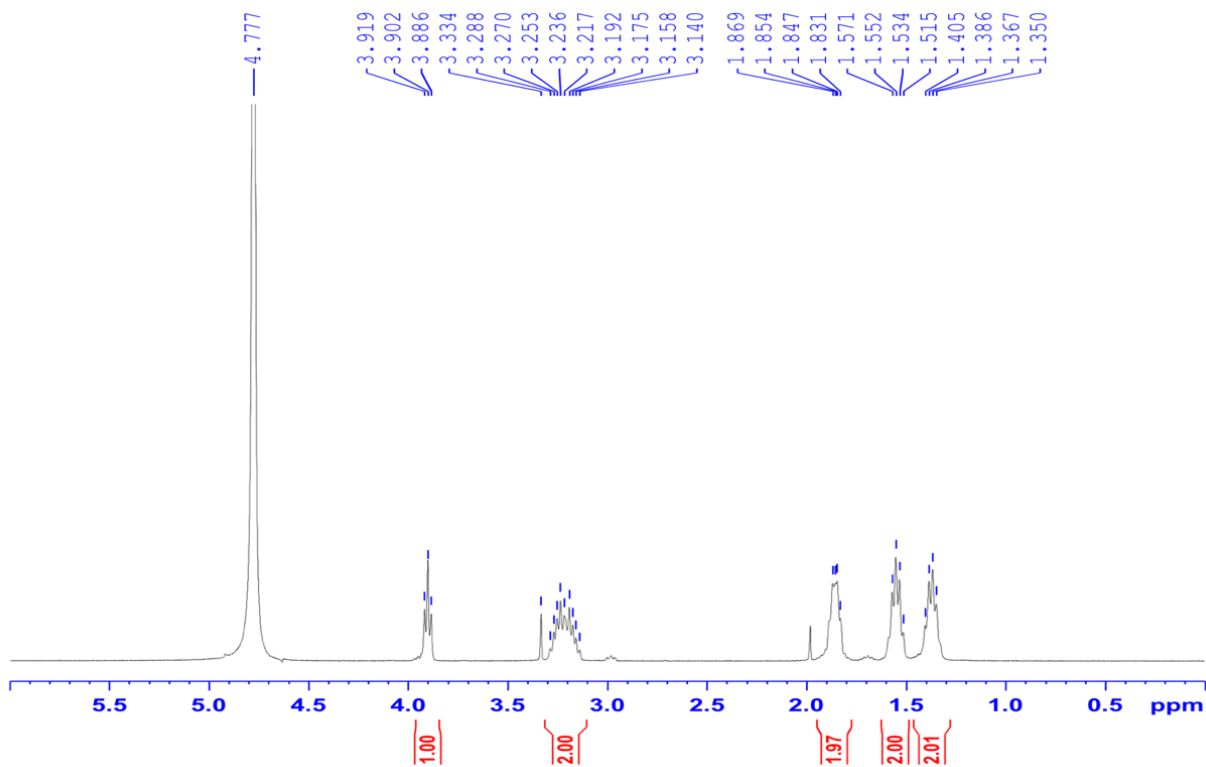

Figure S6| <sup>1</sup>H-NMR spectrum of standard  $\epsilon$ -PL from (400 Hz, D<sub>2</sub>O)

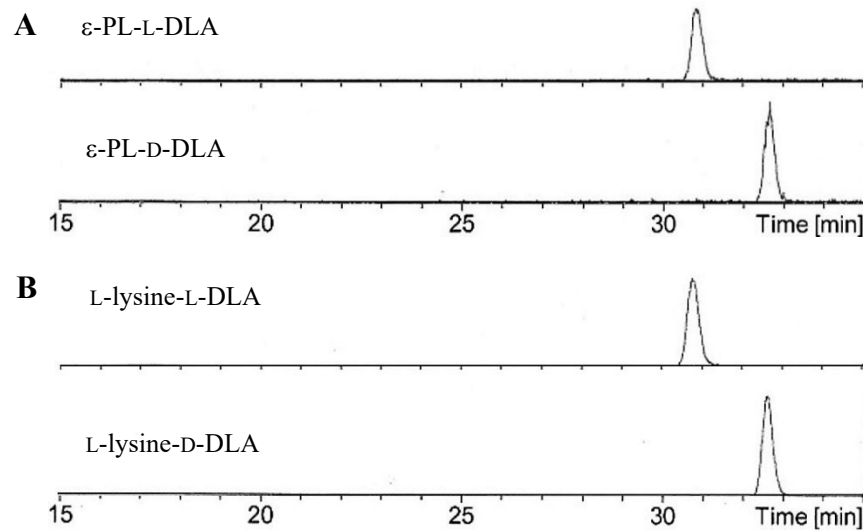

**Figure S7** | Determination of absolute configuration of  $\epsilon$ -PL by the advanced Marfey's method. Extracted ion chromatograms obtained by LC/MS analysis of L- and D-DLA derivatives of acid hydrolysate of  $\epsilon$ -PL from *Ptef::VibA* (E437) (A) and L-lysine (B).

|               |     |     |   |   |   |   |   |   |   |   |   |   |   |   |   |   |   |   |   |   |   |   |   |   |   |   |   |   |   |   |   |   |   |     |   |   |   |   |   |   |   |   |   |   |   |   |     |   |   |   |   |   |   |   |   |   |   |     |   |   |
|---------------|-----|-----|---|---|---|---|---|---|---|---|---|---|---|---|---|---|---|---|---|---|---|---|---|---|---|---|---|---|---|---|---|---|---|-----|---|---|---|---|---|---|---|---|---|---|---|---|-----|---|---|---|---|---|---|---|---|---|---|-----|---|---|
| <b>EfEpls</b> | 1   | DAW | I | F | T | S | G | S | T | G | K | P | K | G | V | A | V | T | H | R | S | A | A | F | V | D | A | E | S | K | I | F | L | P   | N | K | P | L | A | P | G | D | R | V | L | A | G   | L | S | V | A | F | D | A | S | C | E | **  | * |   |
| <b>BIBacB</b> | 1   | L   | A | V | I | V | T | S | G | S | S | G | R | P | K | G | V | M | T | H | R | N | V | V | H | Y | V | D | A | F | T | K | R | --- | I | P | L | S | E | H | D | T | V | L | Q | V | V   | S | F | S | F | D | A | F | S | E |   |     |   |   |
| <b>EfEpls</b> | 61  | E   | M | W | L | A | R | Y | G | A | C | L | V | P | A | P | R | S | L | V | K | A | G | A | D | L | G | A | F | L | T | A | Q | S   | I | S | V | V | S | T | V | P | T | L | A | A | M   | W | P | A | E | A | L | Q | G | L | R | --- |   |   |
| <b>BIBacB</b> | 57  | E   | V | P | I | L | A | C | S | G | R | L | V | I | S | R | K | V | S | D | L | N | I | D | E | L | V | K | T | I | G | K | Y | R   | V | T | L | V | S | C | S | P | L | L | L | N | E   | I | D | K | N | Q | H | L | T | F | H | P   | Q | M |
| <b>EfEpls</b> | 118 | L   | L | * | L | * | G | G | E | A | C | P | P | E | L | A | T | R | L | A | N | T | V | D | S | V | W | N | T | Y | G | P | T | E   | A | T | V | V | A | C | A | P | L | V | A | G | --- | Q | P | V | A | I | G | L | P | L | A | G   |   |   |
| <b>BIBacB</b> | 117 | K   | F | I | S | G | G | D | V | L | K | F | E | Y | V | E | N | I | I | K | G | A | D | - | V | Y | N | S | Y | G | P | T | E | A   | T | V | C | A | T | Y | Q | L | S | S | A | D | R   | K | K | T | S | I | P | I | G | K | P | L   | S | N |
| <b>EfEpls</b> | 174 | W   | K | L | A | V | V | D | A | E | G | N | T | V | R | W | G | E | E | G | E | L | V | I | G | G | V | G | M | A | R | - | Y | L   |   |   |   |   |   |   |   |   |   |   |   |   |     |   |   |   |   |   |   |   |   |   |   |     |   |   |
| <b>BIBacB</b> | 176 | Y   | K | V | Y | I | A | D | Q | Y | G | R | P | Q | P | V | G | V | P | G | E | L | I | G | G | E | G | V | A | R | G | Y | L |     |   |   |   |   |   |   |   |   |   |   |   |   |     |   |   |   |   |   |   |   |   |   |   |     |   |   |

**Figure S8** | Alignment of the deduced amino acid sequences of adenylation domain of *E. festucae*  $\epsilon$ -PL synthetase (EfEpls) and the first adenylation domain of *Bacillus licheniformis* bacitracin synthetase 2 (BIBacB, accession No. AAC06347). Amino acid residues for the lysine-binding pocket in the first A domain of BIBacB are indicated by asterisks.

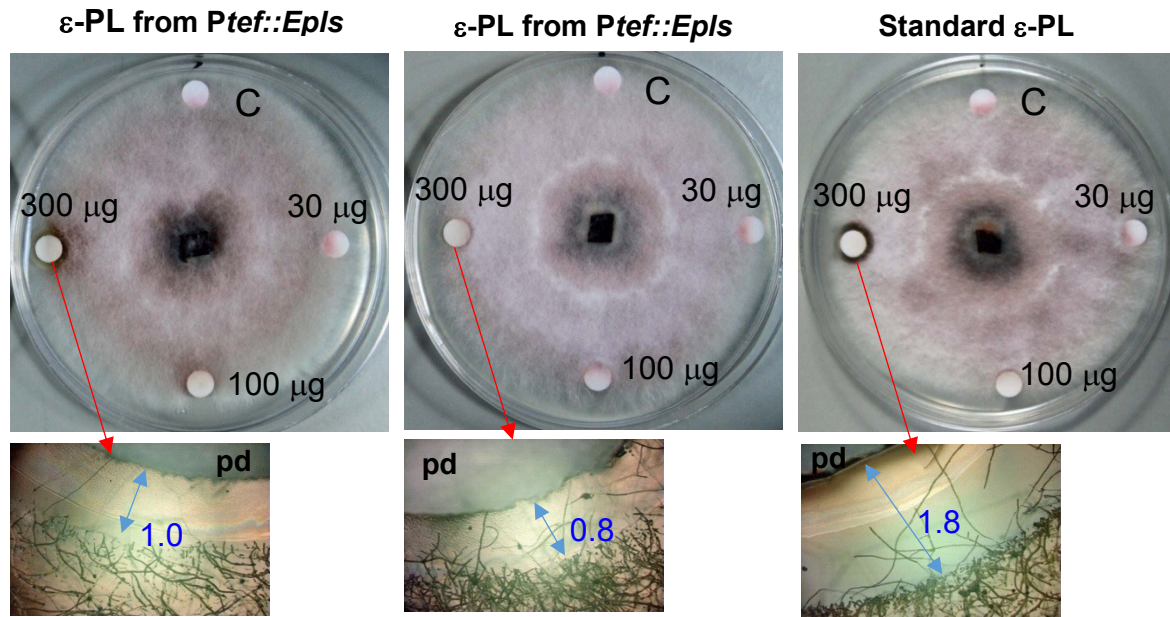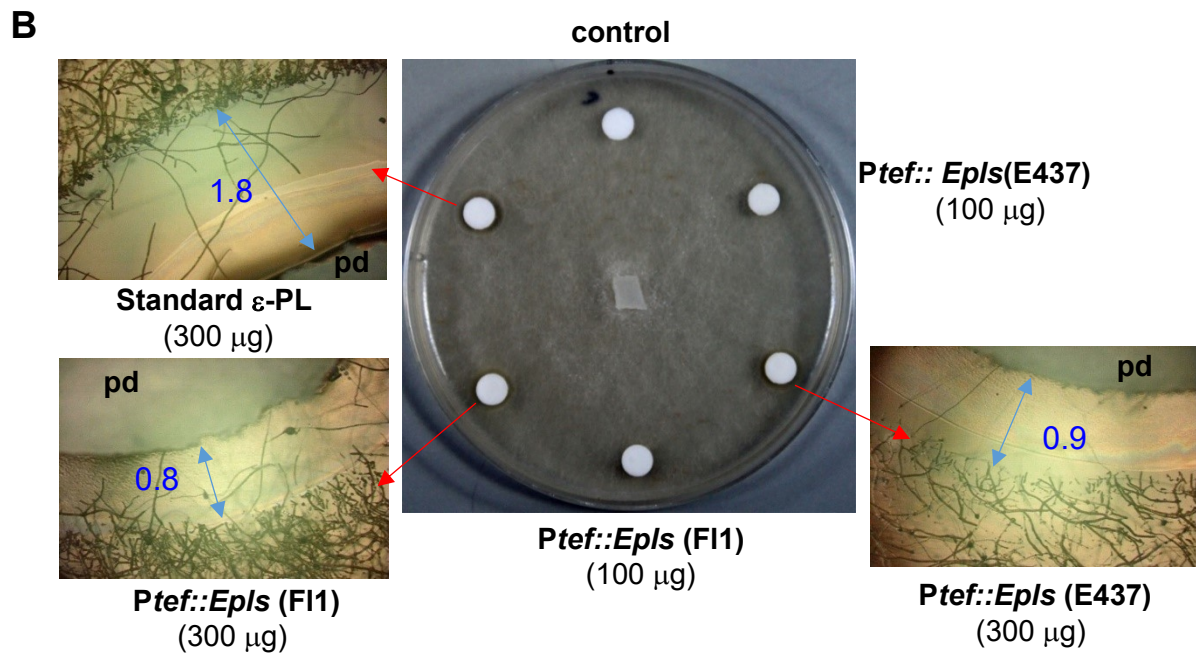

**Figure S9** | Fungal growth inhibition by  $\epsilon$ -PL against (A) *Drechslera erythrospila* and (B) *Phytophthora capsici*. Effects of the  $\epsilon$ -PL was observed 3 (A) or 5 days (B) after applying sample-containing disks. Inhibition zones between paper disk edge and colony front (in mm) around the paper disk (“pd”) were observed through a stereo microscope.
